# Supplementary material for: Effect of GnRH analogs in advanced male breast cancer: 10-year experience from the Henan Breast Cancer Center and literature review
Source: PubMed Central journal article supplement — Chin Med J (Engl). 2024 Mar 6;137(13):1623–5. doi: 10.1097/CM9.0000000000003005 (PMC11230749; doi:10.1097/cm9.0000000000003005), 2024-03-06
Supplement: cm9-137-1623-s001.pdf [file cm9-137-1623-s001.pdf]

1 **Supplementary Table 1: Rescue data for 15 recurrent and metastatic male breast cancer cases.**

| Case | Transfer, age (years) | DFS (month) | Time of recurrence | Metastatic site                         | First-line          | Best response* | PFS (month) | Second-line          | Best response | PFS (month) | Third-line           | Best response |
|------|-----------------------|-------------|--------------------|-----------------------------------------|---------------------|----------------|-------------|----------------------|---------------|-------------|----------------------|---------------|
| 1†   | 63                    | 53          | October 2011       | Lung, bone, lymph nodes, and chest wall | GnRHa + letrozole   | PR             | >122        | First-line ongoing   |               |             |                      |               |
| 2    | 43                    | 42          | June 25, 2012      | Lung and bone                           | GnRHa + anastrozole | SD             | 22          | T-GnRHa + exemestane | PR–SD         | 3.5–9       | T-GnRHa + exemestane | SD–SD         |
| 3    | 59                    | 47          | September 19, 2014 | Brain‡, lung, and adrenal gland         | GnRHa + letrozole   | PD             | 1           | GnRHa + exemestane   | SD            | 5           | TP–NP§               | SD–SD         |
| 4†   | 65                    | 76          | November 6, 2017   | Lung and lymph nodes                    | GnRHa + letrozole   | PR             | >50         | First-line ongoing   |               |             |                      |               |

|    |    |     |                   |                                      |                     |    |     |                                           |       |     |                               |
|----|----|-----|-------------------|--------------------------------------|---------------------|----|-----|-------------------------------------------|-------|-----|-------------------------------|
| 5  | 65 | 53  | May 17, 2017      | Lymph nodes and bones                | GnRHa + anastrozole | SD | 10  | Death by accident                         |       |     |                               |
| 6  | 57 | 12  | May 16, 2015      | Liver                                | GnRHa + anastrozole | PD | 1   | TX                                        | SD    | 2   | Abandon treatment             |
| 7  | 46 | 60  | August 4, 2008    | Liver, lung, lymph nodes, and bone   | GnRHa + anastrozole | SD | 38  | GnRHa + fulvestrant                       | SD    | 9   | Paclitaxel + toremifene SD-NA |
| 8  | 59 | 45  | December 23, 2014 | Liver, spleen, bone marrow, and bone | GnRHa + letrozole   | SD | 48  | Treatment not continued after progression |       |     |                               |
| 9+ | 69 | 166 | January 16, 2017  | Lung and pleura                      | GnRHa + letrozole   | SD | >58 | First-line ongoing                        |       |     |                               |
| 10 | 64 | 0   | September 2016    | Lung and bone                        | GnRHa + exemestane  | SD | 12  | NX-X                                      | PR-SD | 5-7 | Interrupt treatment           |

|    |    |    |                      |                                                  |                                              |       |      |                                 |       |     |                        |       |
|----|----|----|----------------------|--------------------------------------------------|----------------------------------------------|-------|------|---------------------------------|-------|-----|------------------------|-------|
| 11 | 51 | 0  | June 5,<br>2017      | Distant lymph<br>node                            | TE-GnRH<br>a + letrozole                     | PR-SD | 4-14 | NX                              | SD    | 8   | GnRHa +<br>fulvestrant | SD    |
| 12 | 72 | 21 | May 1,<br>2018       | Bone                                             | GnRHa +<br>anastrozole                       | SD    | 24   | GnRHa + f<br>ulvestrant         | SD    | 12  | NA                     | NA    |
| 13 | 49 | 41 | March<br>2015        | Liver, lung, brain, <sup>‡</sup><br>and bone     | GnRHa +<br>letrozole                         | SD    | 12   | GnRHa + f<br>ulvestrant         | SD    | 8   | TX-X                   | SD-SD |
| 14 | 65 | 10 | February<br>22, 2019 | Lung, adrenal<br>gland, bone, and<br>lymph nodes | GnRHa +<br>anastrozole                       | SD    | 9    | NA                              |       |     |                        |       |
| 15 | 60 | 14 | September<br>2018    | Lung, pleura,<br>bone, and lymph<br>nodes        | TX-GnRH<br>a + anastrozole + pa<br>lbociclib | SD-PR | 4-12 | N + anloti<br>nib-anloti<br>nib | SD-SD | 5.5 | NA                     | NA    |

1 \*Assessed according to RECIST1.1

1 †Endocrine therapy is ongoing.

2 ‡The brain metastases of Cases 3 and 13 underwent surgical resection and whole-brain radiotherapy separately.

3 §The docetaxel was adjusted to vinorelbine due to diarrhea. Chemotherapy was discontinued due to the gastrointestinal response of cisplatin.

4 GnRHa = Goserelin; N = Vinorelbine; P = Cisplatin; T = Docetaxel; X = Capecitabine.

5 DFS: Disease-free survival; GnRH: Gonadotropin-releasing hormone; GnRHa: GnRH analog; PD: Progressive disease; PR: Partial regression;

6 RECIST 1.1: Response Evaluation Criteria in Solid Tumors version 1.1; SD: Stable disease.

7

8
